1 **Fully automated, sequential focused ion beam milling**  
2 **for cryo-electron tomography**

3

4 **Authors**

5 <sup>1</sup>Tobias Zachs, <sup>1</sup>João M. Medeiros, <sup>2</sup>Andreas Schertel, <sup>1</sup>Gregor L. Weiss, <sup>1,3</sup>Jannik  
6 Hugener, \*<sup>1</sup>Martin Pilhofer

7

8

9 **Affiliations**

10 <sup>1</sup>Institute of Molecular Biology & Biophysics, Eidgenössische Technische Hochschule  
11 Zürich, CH-8093 Zürich, Switzerland

12 <sup>2</sup>Carl Zeiss Microscopy GmbH, Zeiss Customer Center Europe, D-73447 Oberkochen,  
13 Germany

14 <sup>3</sup>Institute of Biochemistry, Eidgenössische Technische Hochschule Zürich, CH-8093  
15 Zürich, Switzerland

16

17 \*correspondence to: [pilhofer@biol.ethz.ch](mailto:pilhofer@biol.ethz.ch)

18

19

20

21

## 22 **Abstract**

23 Cryo-electron tomography (cryoET) has become a powerful technique at the interface of  
24 structural biology and cell biology, with the unique ability to determine structures of  
25 macromolecular complexes in their cellular context. A major limitation of cryoET is its  
26 restriction to relatively thin samples. Sample thinning by cryo-focused ion beam  
27 (cryoFIB) milling has significantly expanded the range of samples that can be analyzed  
28 by cryoET. Unfortunately, cryoFIB milling is low-throughput, time-consuming and  
29 manual. Here we report a method for fully automated sequential cryoFIB preparation of  
30 high-quality lamellae, including rough milling and polishing. We reproducibly applied  
31 this method to eukaryotic and bacterial model organisms, and show that the resulting  
32 lamellae are suitable for cryoET imaging and subtomogram averaging. Since our method  
33 reduces the time required for lamella preparation and minimizes the need for user input,  
34 we envision the technique will render previously inaccessible projects feasible.

## 35 **Introduction**

36 Cryo-electron tomography (cryoET) is a powerful imaging technique at the interface of  
37 cell biology and structural biology, able to image cells in a near-native state and determine  
38 the structure of macromolecular machines in their cellular context (Beck and Baumeister,  
39 2016; Koning et al., 2018; Kooger et al., 2018; Oikonomou and Jensen, 2017; Plitzko et  
40 al., 2017). CryoET is restricted to samples that are well below 800 nm in thickness and  
41 therefore requires sample thinning techniques for specimens like mammalian cells, *C.*  
42 *elegans*, yeast, cyanobacteria, or biofilms. Biological cryoFIB milling is an emerging  
43 sample thinning technique, which uses a Gallium ion beam to ablate segments of the  
44 sample in order to generate thin lamellae that can be imaged by cryoET (Marko et al.,  
45 2007; Rigort et al., 2010). Unlike previous methodologies, cryoFIB milling produces  
46 artifact-free specimens, in which *in situ* structural information is preserved. Its application  
47 has led to important insights into mechanisms of cellular function (Albert et al., 2017;  
48 Böck et al., 2017; Bykov et al., 2017; Cai et al., 2018; Chaikerasitak et al., 2019; Delarue  
49 et al., 2018; Khanna et al., 2019; Mahamid et al., 2016; Rast et al., 2019; Swulius et al.,  
50 2018; Weiss et al., 2019). Unfortunately, however, cryoFIB milling for cryoET is at an  
51 early stage of technical maturation and the available techniques are highly manual  
52 procedures with relatively low throughput.

53 In current lamella preparation workflows (Marko et al., 2007; Medeiros et al., 2018;  
54 Rigort et al., 2010; Strunk et al., 2012; Zhang et al., 2016), samples are vitrified on  
55 transmission electron microscopy (TEM) grids by plunge-freezing. Grids are then  
56 transferred to a FIB-scanning electron microscope (SEM) instrument, where potential  
57 targets are then identified by SEM and FIB imaging (Supplementary Fig. 1a/b). Using a  
58 series of ‘rough milling’ steps, sections above and below the desired lamella are  
59 sequentially removed by decreasing the separation between two milling areas and using  
60 decreasing FIB milling currents (700 to 100 pA) (Supplementary Fig. 1c-e). Once the  
61 lamella is thinned to ~500 nm, additional targets are identified and thinned by rough  
62 milling in a similar manner. To generate lamellae with a final thickness of 100-250 nm,  
63 the user returns to each target location and further thins (‘polishes’) each lamella using a  
64 low ( $\leq 50$  pA) current (Supplementary Fig. 1f).

65 This methodology allows the production of up to 16 lamellae in 10 h (Medeiros et al.,  
66 2018), however, during such a session, the process requires constant attention from the

67 operator. The milling process has to be monitored and manual user input is required every  
68 10-15 min, e.g. to execute a series of repetitive tasks such as target identification,  
69 positioning milling patterns, changing FIB currents, and visually determining milling end  
70 points. This results in a strenuous procedure with a low throughput relative to the time  
71 invested by the user, as well as significant idle times due to delays in input from the  
72 operator. To overcome these issues, automated sequential cryoFIB milling has become of  
73 paramount interest for the field.

#### 74 **Setup of an automated milling session**

75 Here we report, to our knowledge, the first automated sequential FIB milling method for  
76 the preparation of lamellae for subsequent cryoET imaging. Automation was  
77 implemented on the Zeiss Crossbeam 550 FIB-SEM instrument, using routines that are  
78 available in the SmartFIB software package (Zeiss Microscopy GmbH, Oberkochen,  
79 Germany). Particularly important are the modules for stage backlash and drift correction,  
80 which are critical for reliable targeting of lamella preparation sites. This allows the user  
81 to set up all milling targets and then execute milling in an unattended, fully automated  
82 manner.

83 To begin an automated milling session, FIB current alignments are verified to ensure  
84 accurate milling (Fig. 1a). Grids are then loaded into the FIB-SEM instrument. To  
85 simplify navigation and target identification, an SEM grid overview image is captured  
86 and linked to the stage coordinates as described in the methods. Using the overview image  
87 for stage navigation, the first milling site is identified and centered in both the SEM and  
88 FIB views (Fig. 1b). To improve the accuracy of mechanical stage movements, the stage  
89 is backlash-corrected when moved during automation. To ensure accurate targeting of the  
90 milling site, a series of operations is executed before saving the final target position (Fig.  
91 1c). First, stage backlash correction is manually executed and the target is re-centered in  
92 the FIB image. Second, the target's stage coordinates are saved to the stage navigation  
93 menu. Third, the stage is manually moved off-target and automatically returned to the  
94 saved target location (Fig. 1d). In case the target is *not* properly centered, the above three  
95 steps are repeated (Fig. 1e), otherwise the user can proceed.

96 Next, patterns with specific currents for rough milling (e.g. 700, 300 and 100 pA) and  
97 polishing (e.g. 50 pA) are manually placed onto the FIB image of the target (Fig. 1f/f').



98 This is achieved by either generating a new set of patterns or by loading previously  
99 designed patterns, which is faster and results in more uniform lamellae. To further  
100 improve the accuracy of targeting, we incorporated an additional targeting step based on  
101 drift correction (Fig. 1f/f'). To implement, each set of milling patterns receives a drift  
102 correction box, with user-defined dimensions, which is manually placed in a location  
103 close to the target. By capturing and saving an image of the drift correction box, the  
104 milling patterns are anchored to their positions on the target.

105 After saving the first target to the queue, further targets are added by repeating the  
106 described procedure. This setup-procedure takes ~9 min per target.

### 107 **Processes during automated milling session**

108 To begin sequential automation, exposure of the rough milling patterns that are saved in  
109 the queue is started (Fig. 1g). For each target, the stage automatically moves to the target  
110 position and executes stage backlash correction. Next, image shifts are determined  
111 between the drift correction image that was recorded during the setup procedure and a  
112 drift correction image that is recorded after arriving at the target location. Any existing  
113 shifts are compensated for, using FIB beam shifts, to improve the precision of milling.  
114 The rough milling patterns are then exposed, from the highest to the lowest current  
115 strength. Previously, manual milling methods used a real-time view in order to determine  
116 the time that the FIB needs to cut through the specimen. In our automated approach, the  
117 exposure time is calculated by the software using a user-specified milling depth (typically  
118 10  $\mu\text{m}$ ), milling current, pattern size and material type (e.g. vitrified ice). After exposing  
119 the rough milling patterns for the first target, the procedure is automatically repeated for  
120 the remaining targets.

121 Subsequently, the user can decide whether to perform polishing for all targets in a manual  
122 or automated manner (Fig. 1h). The automation of polishing follows the routine described  
123 above.

124

125

126

## 127 **Application of sequential automated milling**

128 During the development of this method, we tested automated sequential milling using the  
129 model organisms *S. cerevisiae* strain SK1 (hereafter yeast) and the multicellular  
130 cyanobacteria *Anabaena* sp. PCC 7120 (hereafter *Anabaena*) in six independent milling  
131 sessions (Table 1). The number of attempted lamellae per session ranged from five to 20  
132 (Fig. 2). Rough milling success, as defined by the presence of a lamella at the targeted  
133 location after rough milling, was 99% (n=73). The only failure in lamella production was  
134 the result of a user error, as rough milling was accidentally executed on the same target  
135 twice (session F). In session B.1 and B.2, lamellae were successfully generated on ten  
136 targets that were spread across two grids containing two different samples (Table 1). This  
137 shows the robustness of the targeting routine despite sample variations and the execution  
138 of large stage movements during automation.

139 While these results present a significant step forward, we next set out to implement  
140 automated sequential lamella polishing. In a series of sessions (B.2-F), we milled between  
141 five and 20 targets. In total, the success rate (intact lamella detected after polishing) of  
142 automated sequential polishing was 81% (n=57 rough lamellae). Importantly, 9 of the 11  
143 failed polishing attempts occurred in session C, in which the rough-milled lamellae were  
144 left in the FIB-SEM instrument for 10 h before automated polishing was started. Prior to  
145 polishing, these rough lamellae showed signs of bending, which likely resulted in failure  
146 in lamellae polishing. Sequential automated lamella polishing should therefore be  
147 executed without delay after rough milling. Other reasons for failure in lamella milling  
148 could include sample heterogeneity and errors in targeting. If, however, session C were  
149 not taken into account, this automated sequential FIB milling methodology would have a  
150 95% (n=37) success rate.

## 151 **Assessment of sample quality**

152 In order to assess sample quality, we transferred the grids from all sessions to the  
153 cryoTEM. Of the lamellae that were generated in a fully automated manner, 11% (n=46)  
154 were lost in transfer. All remaining lamellae could be imaged by cryoET. From the  
155 cryotomograms, we determined the lamellae thicknesses to range from 155 to 379 nm  
156 (average 232 nm; final polishing patterns were spaced 300 nm apart) (Supplementary Fig.

157 2). Lamellae that were manually polished (sessions A/B.1) had a comparable average  
158 thickness of 258 nm (final polishing patterns were spaced 300 nm apart).

159 CryoET imaging of the automatically generated lamellae revealed distinct cellular  
160 features and macromolecular complexes. Yeast tomograms showed a characteristic  
161 nucleoplasm, cytoplasmic ribosomes, nuclear envelope, nuclear pore complexes, and  
162 cellular compartments (Fig. 3b). *Anabaena* tomograms showed thylakoid membranes,  
163 phycobilisomes and septal junctions (Fig. 3c). To further assess sample and data quality,  
164 we performed subtomogram averaging of *Anabaena* septal junctions, which had been  
165 characterized recently by a manual cryoFIB milling/cryoET approach (Weiss et al.,  
166 2019). From nine lamellae, a total of 412 subvolumes were extracted, averaged and  
167 classified in order to remove misaligned particles. The 343 remaining subvolumes were  
168 then averaged and symmetrized. The resulting structure revealed key features, including  
169 a cap module with five arches, a plug module and a tube module (Fig. 3e-h). Fourier shell  
170 correlation (FSC) analyses indicate that the average has a resolution that is similar to a  
171 structure that was calculated using the same number of particles extracted from  
172 tomograms generated in a previous study (Weiss et al., 2019) (manual milling)  
173 (Supplementary Fig. 3).

## 174 **Discussion**

175 In conclusion, our automated sequential cryoFIB milling method allows for the  
176 production of high-quality lamellae for cryoET imaging and will impact cryoFIB/cryoET  
177 projects in several ways. First, the time investment by the operator is significantly reduced  
178 from ~10 h in a manual milling session to ~2.4 h for an automated sequential milling  
179 session, assuming 16 targets are milled. Second, by removing the need for frequent user  
180 inputs and idle times, the minimum required machine time is reduced from ~38 min  
181 (Medeiros et al., 2018) (i.e. 16 lamellae in 10 h) to ~25.5 min (9 min setup plus 16.5 min  
182 milling) per lamella. Third, based on the robustness and customizable nature of the  
183 method, the procedure can be adapted to a wide range of samples and milling techniques  
184 (Toro-Nahuelpan et al.; Wolff et al., 2019). Fourth, the automated procedure will allow  
185 the user to systematically explore novel milling methods by reusing uniform milling  
186 patterns. Fifth, the method can generally be combined with correlated approaches that  
187 allow for target pre-screening, for instance cryo-light microscopy or cryo-FIB-SEM  
188 volume imaging (Eibauer et al., 2012; Gorelick et al., 2019; Koning et al., 2014; Schertel

189 et al., 2013; Schorb et al., 2017; Sviben et al., 2016; Vidavsky et al., 2016). That said, the  
190 higher throughput achieved by automated cryoFIB milling (shown here) in combination  
191 with fast cryoET data collection schemes (Chreifi et al., 2019; Eisenstein et al., 2019),  
192 might in many cases eliminate the need for target pre-identification by correlated  
193 approaches. Altogether, the development of automated sequential cryoFIB milling  
194 renders cryoET applicable to previously unfeasible projects.

195

## 196 **Acknowledgments**

197 Joao Matos is acknowledged for providing resources for culturing yeast cells. We thank  
198 Saskia Mimietz-Oeckler and Andreas Hallady (Leica Microsystems GmbH, Vienna,  
199 Austria) for technical support. We thank ScopeM for instrument access at ETH Zürich.  
200 MP was supported by the Swiss National Science Foundation (#31003A\_179255), the  
201 European Research Council (#679209) and the Nomis Foundation.

202

## 203 **Methods**

### 204 Overview of the equipment and workflow

205 The method was established and tested on a Crossbeam 550 FIB-SEM instrument (Carl  
206 Zeiss Microscopy) equipped with a copper band-cooled mechanical cryo-stage and an  
207 integrated VCT500 vacuum transfer system (Leica Microsystems). The detectors used  
208 included an InLens secondary electron (SE) detector for determining grid topology (Carl  
209 Zeiss Microscopy) and a SE2 detector for identifying milling targets and assessing the ice  
210 thickness (Carl Zeiss Microscopy). In our workflow, EM grids were prepared with  
211 budding yeast strain SK1 and *Anabaena* sp. PCC 7120, and clipped into FIB milling  
212 Autogrids (ThermoFisher Scientific, Waltham, Massachusetts, U.S.). These grids were  
213 then mounted onto a pre-tilted Autogrid holder (Medeiros et al., 2018) (Leica  
214 Microsystems) using a VCM loading station (Leica Microsystems). Using the VCT500  
215 shuttle, the Autogrid holder was transferred to an ACE600 cryo-sputter coater (Leica  
216 Microsystems) under cryogenic conditions and the samples were sputter-coated with a 4  
217 nm thick layer of tungsten. After sputter coating, the samples were transferred into the  
218 Crossbeam 550 using the VCT500 shuttle. In the Crossbeam 550, the gas injection system  
219 (UniGIS) was used to deposit an organometallic platinum precursor layer onto each grid.  
220 Automated sequential FIB milling was subsequently set up and executed. Sample  
221 preparation, plunge-freezing, Autogrid mounting, holder loading and vacuum cryo-  
222 transfer steps were executed similarly to what was described in Medeiros et al. 2018. Any  
223 deviations to the previously published protocol are described below.

### 224 Cell culture and plunge freezing

225 FIB milling tests were performed using the cyanobacterial strain *Anabaena* sp. PCC 7120  
226 and the *S. cerevisiae* strain SK1. The *Anabaena* strain was grown and prepared for FIB  
227 milling as previously described in Weiss et al. 2019. Yeast cells were prepared as  
228 previously described by Medeiros et al. 2018.

### 229 Equipment calibration

230 To ensure that automated sequential FIB milling was successful, the Crossbeam 550 was  
231 properly aligned. While the SEM column alignments are stable and non-essential during  
232 automated milling, the FIB alignment between different currents at a given voltage (30

233 kV for biological cryo-samples) should be checked and optimized. Typically, this  
234 calibration is done weekly or when deemed necessary and takes roughly 60 min to  
235 complete. In case of deviation, on-the-fly adjustments are possible on a loaded cryo-  
236 sample, however, standard calibration procedures are best performed on a silicon wafer  
237 due to its structural homogeneity, which allows better evaluation of the FIB beam shape.  
238 Once inserted into the chamber, the stage was tilted by 54° to be perpendicular to the FIB  
239 beam and then moved to the working distance (i.e. coincidence point). Using the ‘spot’  
240 function in an unexposed sample region, the beam was focused to its spot size allowing  
241 it to burn a hole into the silicon. If the current is properly calibrated, then the beam will  
242 produce a spot that is round with sharp edges. This was best seen when using a mixed  
243 signal of the InLens and SE2 detector. If a beam spot had imperfections, like a tailing  
244 edge, beam parameters including focus, stigmatism and aperture alignments need to be  
245 improved and saved. After optimizing these parameters for each current, all currents were  
246 aligned against the reference current. This was best performed by centering an easily  
247 recognizable structure like a burnt hole for each beam onto the exact position in the image  
248 taken with the reference current. Finally, to ensure that the currents were properly aligned,  
249 a location is imaged by each current. If properly aligned, switching between currents  
250 should not lead to focus changes or beam offsets.

## 251 Sample coating

252 To enhance sample conductivity and decrease the effects of charging, EM grids were  
253 coated with a ~4 nm layer of tungsten using the sputter coating head on the ACE600.  
254 After inserting the holder into the FIB-SEM, a protection layer of organometallic  
255 platinum precursor was deposited onto each grid to minimize the curtaining effect. For  
256 cold deposition of platinum precursor, the holder was moved 3 mm below the coincidence  
257 point and was tilted to 20 degrees. By positioning the gas injection system (GIS) needle  
258 above each grid and opening the GIS for 30 s, a layer of platinum precursor was deposited  
259 onto the sample. Since the GIS needle was mounted at a similar angle as the FIB column,  
260 deposition of platinum occurred preferentially on the side of the cells where the FIB beam  
261 hits the sample, ensuring the best protection. For deposition under cryo-conditions, it is  
262 essential that the heating element of the GIS needle and reservoir are turned off to keep  
263 the system at room temperature (28 °C).

264

## 265 Stage registration

266 To assist in the identification of targets, overview images of an entire EM grid are taken.  
267 On the Zeiss Crossbeam 550, these images can be coupled to the stage navigation. To  
268 calibrate stage registration a high-resolution (4096 x 3072 pixels, 35x) overview image  
269 was taken with the SE2 detector, which provided the best information for identifying  
270 targets inside the vitrified ice and determining ice thickness. This overview image was  
271 then loaded onto the stage navigation bar and registered by correlating three distinctive  
272 points on the image to their specific positions on the stage as observed in the live SEM  
273 view. After completion, double clicking on a desired target image location in the  
274 navigation bar automatically moves the stage to the location of interest. In addition,  
275 backlash correction was also included for all automated stage movements, using the user  
276 preference settings of the software SmartSEM (Carl Zeiss Microscopy).

## 277 Defining milling materials

278 To permit unsupervised automation of lamellae production, the Crossbeam 550 was  
279 calibrated to mill a cross-section with a specified depth through the sample. To ensure  
280 proper milling, the system needs to be calibrated for a distinct ‘material’ so that the correct  
281 milling parameters like dose are applied during milling. For cryo-TEM lamella  
282 preparation the material “vitrified ice” was created using a dose calibration of 20 mC /  
283 cm<sup>2</sup> being equivalent to a milling depth of 1 μm in cross-section mode.

## 284 Parameters for imaging and milling

285 For SEM imaging, voltages from 1.9 - 5 kV and a constant current of 28 pA were used.  
286 To capture SEM images, we most commonly used the InLens detector to obtain surface  
287 information of the sample. During FIB imaging, on the other hand, a fixed voltage of 30  
288 kV and a low current (20pA) was used. FIB images were usually captured by using the  
289 SE2 detector, which is less sensitive to imaging-induced charging. During automated  
290 sequential milling, four sets of currents above and below the desired lamellae were used.  
291 For rough milling 700 pA, 300 pA and 100 pA currents were implemented. To then polish  
292 the lamellae, a 50 pA current was used. For milling, we defined the patterns to be executed  
293 using bi-directional and cross-section cycle mode with a 10 μm milling depth.

294



295 Automated sequential FIB milling protocol

296 To generate high quality lamellae, it was essential to prepare the FIB-SEM and sample  
297 for automated sequential milling. Preparations included checking and calibrating the FIB  
298 currents, coating the sample with a layer of tungsten and organometallic platinum, and  
299 performing stage registration. Once these steps were executed, automated sequential  
300 milling was initiated by identifying and setting up milling targets.

301 The grid overview image in the stage navigator was used to identify a milling target. The  
302 identified target was then manually centered in the live FIB view with the aid of the SEM.  
303 To improve the accuracy of automated stage movements, backlash correction was  
304 performed manually and implemented for all automated stage movements. The target's  
305 stage coordinates were then saved in the stage navigator. To ensure that the instrument  
306 was able to perform targeting during automation, the stage was manually moved away  
307 from the target and then instructed to move back to its saved location. The target was  
308 located using the live FIB view and if necessary, manually centered again. If manual  
309 centering was required, the new stage location was saved and the instrument's ability to  
310 perform targeting was tested again. To ensure successful milling during automation, it  
311 was essential to refine the stage location until the stage was able to perform targeting  
312 successfully.

313 Once an accurate stage movement was achieved, milling patterns were placed onto a  
314 target FIB image captured using SmartFIB. In SmartFIB, each pattern contains specific  
315 milling conditions (i.e. current, milling depth, size, shape, etc.) and a designated FIB  
316 milling location. SmartFIB allows the placing of multiple patterns with different  
317 conditions onto a single FIB image in order to perform automated milling. Patterns were  
318 placed and their properties were changed by using the SmartFIB GUI in the 'Attributes'  
319 tab. When testing this methodology, we placed eight rectangular milling patterns: six  
320 rough milling and two polishing patterns (Supplementary table 1). The final polishing  
321 patterns were spaced 300 nm apart, which from our experience results in an average  
322 lamella thickness of 225-275 nm. To make uniform lamellae it was also possible to save  
323 these eight patterns as a recipe, which can be dragged and dropped onto images of other  
324 milling targets. To then save these milling patterns, it was essential to separate the rough  
325 and polishing patterns. This was accomplished by deleting the polishing patterns from  
326 our recipe, saving only the rough milling patterns, undoing the deletion of the polishing



327 patterns (using the SmartFIB Undo button), deleting all rough milling patterns and then  
328 saving only the polishing patterns.

329 To improve the targeting accuracy of this methodology, a drift correction step was also  
330 added to each set of rough and polishing milling patterns immediately before being saved.  
331 This was done in the SmartFIB ‘attributes’ tab, by capturing and saving an image of a  
332 defined region of the FIB view. During the automated protocol SmartFIB would use this  
333 image to perform image recognition before beginning milling and compensate for small  
334 shifts to ensure the milling patterns are placed correctly on the target. When testing this  
335 methodology, it was important to save and then load the same drift correction image for  
336 both the rough and polishing milling patterns. This ensured the highest accuracy when  
337 moving from rough milling to polishing.

338 After saving a set of rough and polishing patterns, the described method can be repeated  
339 for further targets. For an automated protocol, about 9 min were needed to set up each  
340 target. It is possible to also automate the milling of targets found on separate EM grids.  
341 Once satisfied with the number of targets, all rough milling recipes in the SmartFIB queue  
342 were selected and exposed. Exposure of a typical rough milling target takes about 12  
343 min. Upon completion, rough milling targets were observed using the SEM and FIB to  
344 determine their quality. To then initiate polishing, it is possible to either tick all polishing  
345 recipes and expose them, or individually move to each target using SmartFIB, take a FIB  
346 image, manually drag polishing patterns into place and expose the lamella. Polishing  
347 typically took about 4.5 min. Once all targets are polished, the lamellae are removed from  
348 the instrument and stored. It is essential to note that we aimed to keep the lamellae in the  
349 instrument for <2 h after beginning polishing to minimize contamination. In theory, this  
350 limits our lamellae production to  $\leq 20$  targets. If, however, aspects including the milling  
351 depth, pattern sizes or currents were changed, it would be possible to generate more  
352 lamellae. Note that in our attempts, grids with milled lamellae were transported in a dry-  
353 shipper from Zeiss Oberkochen, Germany to Zürich, Switzerland prior to cryoET  
354 imaging, possibly resulting in some lamellae breaking. An overview of all the milling  
355 attempts performed can be found in Table 1.

356 Cryo-electron tomography, tomogram reconstruction and subtomogram averaging

357 Data was collected on a Titan Krios 300kV electron microscope (ThermoFisher)  
358 equipped with a field emission gun, imaging filter (Gatan, Munich, Germany) (slit width

359 20 eV) and K2 Summit direct electron detector (Gatan). To generate an overview of each  
360 grid, grid montages were collected at 135x magnification using SerialEM (Mastronarde,  
361 2005). UCSF Tomo (Zheng et al., 2007) was used for automated recording of tilt series  
362 (+60° and -60° tilt range, 2° increments). Data was collected at a defocus of -8 μm, total  
363 accumulated dose of ~140 e<sup>-</sup> / Å<sup>2</sup> and pixel size of 3.38 Å. Tomogram reconstruction and  
364 subtomogram averaging was performed according to Weiss et al. 2019. Briefly,  
365 tomograms were reconstructed using the IMOD package (Kremer et al., 1996) and  
366 subtomogram averaging was performed using PEET (Nicastro et al., 2006). A total of 412  
367 particles were extracted and averaged in a box of 44 x 44 x 44 pixels with a pixel size of  
368 0.68 nm. PEET classification was then used to remove misaligned particles (343 final  
369 particles). 5-fold symmetry was applied to obtain the final average. The FSC (Fourier  
370 Shell Correlation) was generated by using the PEET command calcFSC.

371 Data and code availability

372 Example tomograms of yeast and *Anabaena lamellae* milled in a fully automated manner  
373 and the final septal junction subtomogram average determined in this study were  
374 deposited to the Electron Microscopy Data Bank (accession number EMDB xxx-yyy for  
375 the tomograms and zzz for the subtomogram average).

376

377 **References**

- 378 Albert S, Schaffer M, Beck F, Mosalaganti S, Asano S, Thomas HF, Plitzko JM, Beck  
379 M, Baumeister W, Engel BD. 2017. Proteasomes tether to two distinct sites at the  
380 nuclear pore complex. *Proc Natl Acad Sci U S A* **114**:13726–13731.  
381 doi:10.1073/pnas.1716305114
- 382 Beck M, Baumeister W. 2016. Cryo-Electron Tomography: Can it Reveal the Molecular  
383 Sociology of Cells in Atomic Detail? *Trends Cell Biol* **26**:825–837.  
384 doi:10.1016/J.TCB.2016.08.006
- 385 Böck D, Medeiros JM, Tsao H-F, Penz T, Weiss GL, Aistleitner K, Horn M, Pilhofer M.  
386 2017. In situ architecture, function, and evolution of a contractile injection system.  
387 *Science* **357**:713–717. doi:10.1126/science.aan7904
- 388 Bykov YS, Schaffer M, Dodonova SO, Albert S, Plitzko JM, Baumeister W, Engel BD,  
389 Briggs JA. 2017. The structure of the COPI coat determined within the cell. *Elife* **6**.  
390 doi:10.7554/eLife.32493
- 391 Cai S, Böck D, Pilhofer M, Gan L. 2018. The in situ structures of mono-, di-, and  
392 trinucleosomes in human heterochromatin. *Mol Biol Cell* **29**:2450–2457.  
393 doi:10.1091/mbc.E18-05-0331
- 394 Chaikerasitak V, Khanna K, Nguyen KT, Sugie J, Egan ME, Erb ML, Vavilina A,  
395 Nonejuie P, Nieweglowska E, Pogliano K, Agard DA, Villa E, Pogliano J. 2019.  
396 Viral Capsid Trafficking along Treadmilling Tubulin Filaments in Bacteria. *Cell*  
397 **177**:1771-1780.e12. doi:10.1016/J.CELL.2019.05.032
- 398 Chreifi G, Chen S, Metskas LA, Kaplan M, Jensen GJ. 2019. Rapid tilt-series  
399 acquisition for electron cryotomography. *J Struct Biol* **205**:163–169.  
400 doi:10.1016/J.JSB.2018.12.008
- 401 Delarue M, Brittingham GP, Pfeffer S, Surovtsev IV, Pinglay S, Kennedy KJ, Schaffer  
402 M, Gutierrez JI, Sang D, Poterewicz G, Chung JK, Plitzko JM, Groves JT, Jacobs-  
403 Wagner C, Engel BD, Holt LJ. 2018. mTORC1 Controls Phase Separation and the  
404 Biophysical Properties of the Cytoplasm by Tuning Crowding. *Cell* **174**:338-  
405 349.e20. doi:10.1016/J.CELL.2018.05.042

- 406 Eibauer M, Hoffmann C, Plitzko JM, Baumeister W, Nickell S, Engelhardt H. 2012.  
407 Unraveling the structure of membrane proteins in situ by transfer function corrected  
408 cryo-electron tomography. *J Struct Biol* **180**:488–496.  
409 doi:10.1016/J.JSB.2012.09.008
- 410 Eisenstein F, Danev R, Pilhofer M. 2019. Improved applicability and robustness of fast  
411 cryo-electron tomography data acquisition. *J Struct Biol*.  
412 doi:10.1016/J.JSB.2019.08.006
- 413 Gorelick S, Buckley G, Gervinskis G, Johnson TK, Handley A, Caggiano MP,  
414 Whisstock JC, Pocock R, de Marco A. 2019. PIE-scope, integrated cryo-correlative  
415 light and FIB/SEM microscopy. *Elife* **8**. doi:10.7554/eLife.45919
- 416 Khanna K, Lopez-Garrido J, Zhao Z, Watanabe R, Yuan Y, Sugie J, Pogliano K, Villa  
417 E. 2019. The molecular architecture of engulfment during *Bacillus subtilis*  
418 sporulation. *Elife* **8**. doi:10.7554/eLife.45257
- 419 Koning RI, Celler K, Willemsse J, Bos E, van Wezel GP, Koster AJ. 2014. Correlative  
420 Cryo-Fluorescence Light Microscopy and Cryo-Electron Tomography of  
421 *Streptomyces*. *Methods Cell Biol* **124**:217–239. doi:10.1016/B978-0-12-801075-  
422 4.00010-0
- 423 Koning RI, Koster AJ, Sharp TH. 2018. Advances in cryo-electron tomography for  
424 biology and medicine. *Ann Anat - Anat Anzeiger* **217**:82–96.  
425 doi:10.1016/J.AANAT.2018.02.004
- 426 Kooger R, Szwedziak P, Böck D, Pilhofer M. 2018. CryoEM of bacterial secretion  
427 systems. *Curr Opin Struct Biol* **52**:64–70. doi:10.1016/J.SBI.2018.08.007
- 428 Kremer JR, Mastrorarde DN, McIntosh JR. 1996. Computer Visualization of Three-  
429 Dimensional Image Data Using IMOD. *J Struct Biol* **116**:71–76.  
430 doi:10.1006/JSBI.1996.0013
- 431 Mahamid J, Pfeffer S, Schaffer M, Villa E, Danev R, Cuellar LK, Förster F, Hyman AA,  
432 Plitzko JM, Baumeister W. 2016. Visualizing the molecular sociology at the HeLa  
433 cell nuclear periphery. *Science* **351**:969–72. doi:10.1126/science.aad8857

- 434 Marko M, Hsieh C, Schalek R, Frank J, Mannella C. 2007. Focused-ion-beam thinning  
435 of frozen-hydrated biological specimens for cryo-electron microscopy. *Nat*  
436 *Methods* **4**:215–217. doi:10.1038/nmeth1014
- 437 Mastronarde DN. 2005. Automated electron microscope tomography using robust  
438 prediction of specimen movements. *J Struct Biol* **152**:36–51.  
439 doi:10.1016/J.JSB.2005.07.007
- 440 Medeiros JM, Böck D, Weiss GL, Kooger R, Wepf RA, Pilhofer M. 2018. Robust  
441 workflow and instrumentation for cryo-focused ion beam milling of samples for  
442 electron cryotomography. *Ultramicroscopy* **190**:1–11.  
443 doi:10.1016/J.ULTRAMIC.2018.04.002
- 444 Nicastro D, Schwartz C, Pierson J, Gaudette R, Porter ME, McIntosh JR. 2006. The  
445 molecular architecture of axonemes revealed by cryoelectron tomography. *Science*  
446 **313**:944–8. doi:10.1126/science.1128618
- 447 Oikonomou CM, Jensen GJ. 2017. Cellular Electron Cryotomography: Toward  
448 Structural Biology In Situ. *Annu Rev Biochem* **86**:873–896. doi:10.1146/annurev-  
449 biochem-061516-044741
- 450 Plitzko JM, Schuler B, Selenko P. 2017. Structural Biology outside the box — inside the  
451 cell. *Curr Opin Struct Biol* **46**:110–121. doi:10.1016/J.SBI.2017.06.007
- 452 Rast A, Schaffer M, Albert S, Wan W, Pfeffer S, Beck F, Plitzko JM, Nickelsen J, Engel  
453 BD. 2019. Biogenic regions of cyanobacterial thylakoids form contact sites with  
454 the plasma membrane. *Nat Plants* **5**:436–446. doi:10.1038/s41477-019-0399-7
- 455 Rigort A, Bäuerlein FJB, Leis A, Gruska M, Hoffmann C, Laugks T, Böhm U, Eibauer  
456 M, Gnaegi H, Plitzko JM. 2010. Micromachining tools and correlative approaches  
457 for cellular cryo-electron tomography. *J Struct Biol* **172**:169–179.  
458 doi:10.1016/J.JSB.2010.02.011
- 459 Schertel A, Snaidero N, Han H-M, Ruhwedel T, Laue M, Grabenbauer M, Möbius W.  
460 2013. Cryo FIB-SEM: Volume imaging of cellular ultrastructure in native frozen  
461 specimens. *J Struct Biol* **184**:355–360. doi:10.1016/J.JSB.2013.09.024

- 462 Schorb M, Gaechter L, Avinoam O, Sieckmann F, Clarke M, Bebeacua C, Bykov YS,  
463 Sonnen AF-P, Lihl R, Briggs JAG. 2017. New hardware and workflows for semi-  
464 automated correlative cryo-fluorescence and cryo-electron  
465 microscopy/tomography. *J Struct Biol* **197**:83–93. doi:10.1016/J.JSB.2016.06.020
- 466 Strunk KM, Ke D, Gray JL, Zhang P. 2012. Thinning of Large Biological Cells for  
467 Cryo-TEM Characterization by Cryo-FIB Milling. *J Microsc* **247**:220.  
468 doi:10.1111/J.1365-2818.2012.03635.X
- 469 Sviben S, Gal A, Hood MA, Bertinetti L, Politi Y, Bennet M, Krishnamoorthy P,  
470 Schertel A, Wirth R, Sorrentino A, Pereiro E, Faivre D, Scheffel A. 2016. A  
471 vacuole-like compartment concentrates a disordered calcium phase in a key  
472 coccolithophorid alga. *Nat Commun* **7**:11228. doi:10.1038/ncomms11228
- 473 Swulius MT, Nguyen LT, Ladinsky MS, Ortega DR, Aich S, Mishra M, Jensen GJ.  
474 2018. Structure of the fission yeast actomyosin ring during constriction. *Proc Natl*  
475 *Acad Sci U S A* **115**:E1455–E1464. doi:10.1073/pnas.1711218115
- 476 Toro-Nahuelpan M, Zagoriy I, Senger F, Blanchoin L, Théry M, Mahamid J. *BioRxiv*  
477 Tailoring cryo-electron microscopy grids by photo-micropatterning for in-cell  
478 structural studies. doi:10.1101/676189
- 479 Vidavsky N, Akiva A, Kaplan-Ashiri I, Rechav K, Addadi L, Weiner S, Schertel A.  
480 2016. Cryo-FIB-SEM serial milling and block face imaging: Large volume  
481 structural analysis of biological tissues preserved close to their native state. *J Struct*  
482 *Biol* **196**:487–495. doi:10.1016/J.JSB.2016.09.016
- 483 Weiss GL, Kieninger A-K, Maldener I, Forchhammer K, Pilhofer M. 2019. Structure  
484 and Function of a Bacterial Gap Junction Analog. *Cell* **178**:374–384.  
485 doi:10.1016/j.cell.2019.05.055
- 486 Wolff G, Limpens RWAL, Zheng S, Snijder EJ, Agard DA, Koster AJ, Bárcena M.  
487 2019. Mind the gap: micro-expansion joints drastically decrease the bending of  
488 FIB-milled cryo-lamellae. *J Struct Biol*. doi:10.1016/J.JSB.2019.09.006
- 489 Zhang J, Ji G, Huang X, Xu W, Sun F. 2016. An improved cryo-FIB method for  
490 fabrication of frozen hydrated lamella. *J Struct Biol* **194**:218–223.

491           doi:10.1016/J.JSB.2016.02.013

492   Zheng SQ, Keszthelyi B, Branlund E, Lyle JM, Braunfeld MB, Sedat JW, Agard DA.  
493           2007. UCSF tomography: An integrated software suite for real-time electron  
494           microscopic tomographic data collection, alignment, and reconstruction. *J Struct*  
495           *Biol* **157**:138–147. doi:10.1016/j.jsb.2006.06.005

496

497

498

499

500

501

502

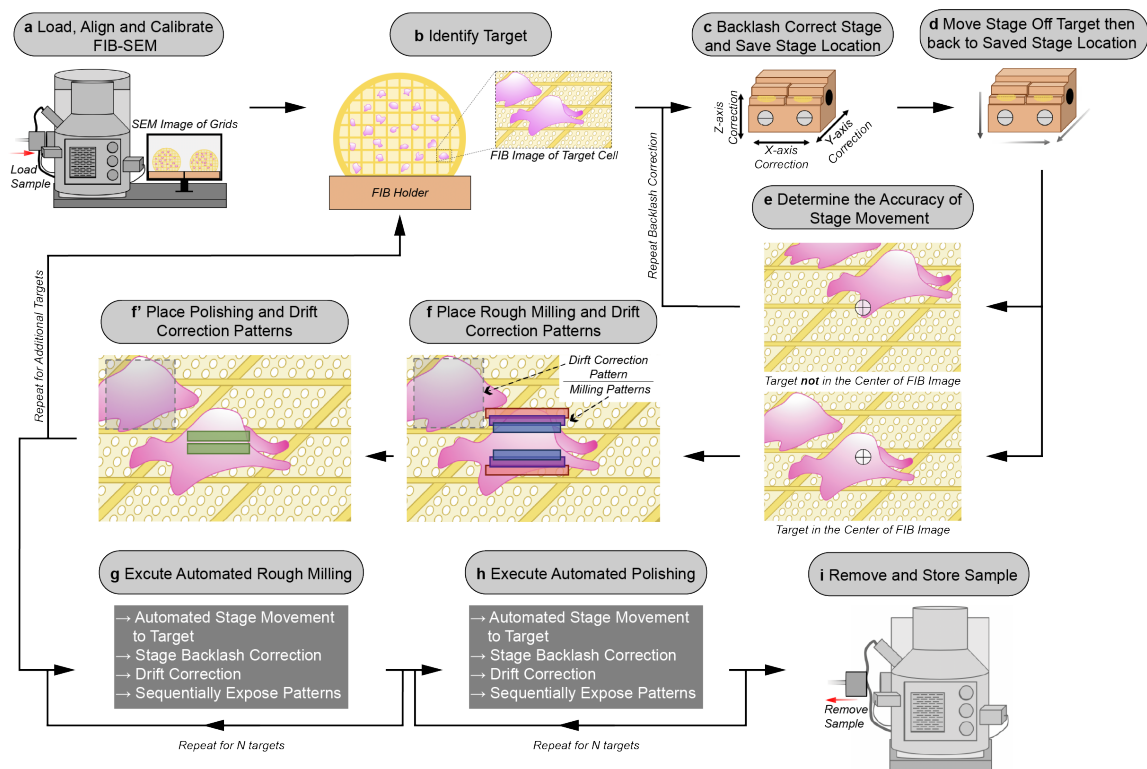

503

504 **Figure 1. Schematic of the automated sequential cryoFIB milling workflow.**

505 **a:** FIB currents are aligned and calibrated, and the sample is loaded into the FIB-SEM  
506 instrument.

507 **b:** A target cell is identified on the grid with the FIB.

508 **c:** To correct for errors in mechanical stage movements, backlash correction of the stage  
509 is performed. The resulting stage location is saved in the stage navigator.

510 **d:** The stage is randomly moved out of position by the user. Using the saved  
511 coordinates, the stage is moved back to the target using the saved position in the stage  
512 navigator.

513 **e:** The accuracy of this autonomous stage movement is determined by the user. If the  
514 target is not centered in the FIB image, backlash correction is repeated until accurate  
515 targeting is achieved (c-e).

516 **f/f':** Rough milling, polishing and drift correction patterns are placed onto the image.  
517 Rough milling and polishing patterns are saved separately to the queue. The procedure  
518 (b-f') is repeated to select additional targets.



519 **g/h:** Rough milling and lamellae polishing are executed automatically.

520 **i:** The grids with milled lamellae are removed and stored.

521

522

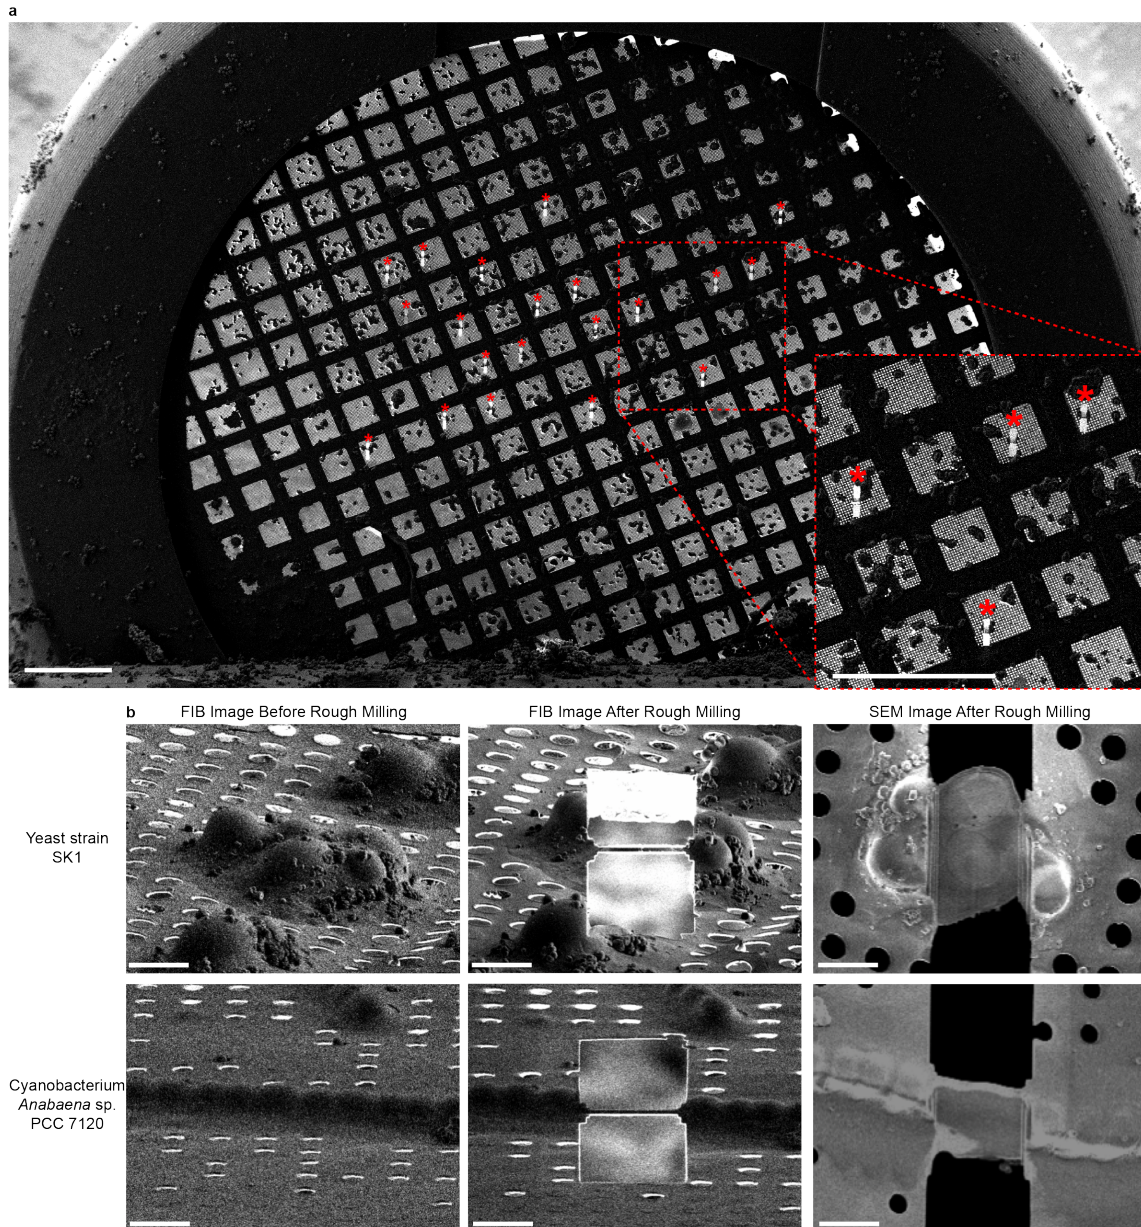

523

524 **Figure 2. Representative images of lamellae generated by automated sequential**  
525 **rough milling.**

526 **a:** SEM grid overview image including 20 yeast targets (asterisks) on which rough  
527 milling was performed in an automated sequential manner (session C). Bars, 200  $\mu\text{m}$ .

528 **b:** Representative SEM and FIB images of yeast and cyanobacterial *Anabaena* cells  
529 captured before and after fully automated sequential rough milling (session B.1 and  
530 B.2). Bars, 5  $\mu\text{m}$ .

531



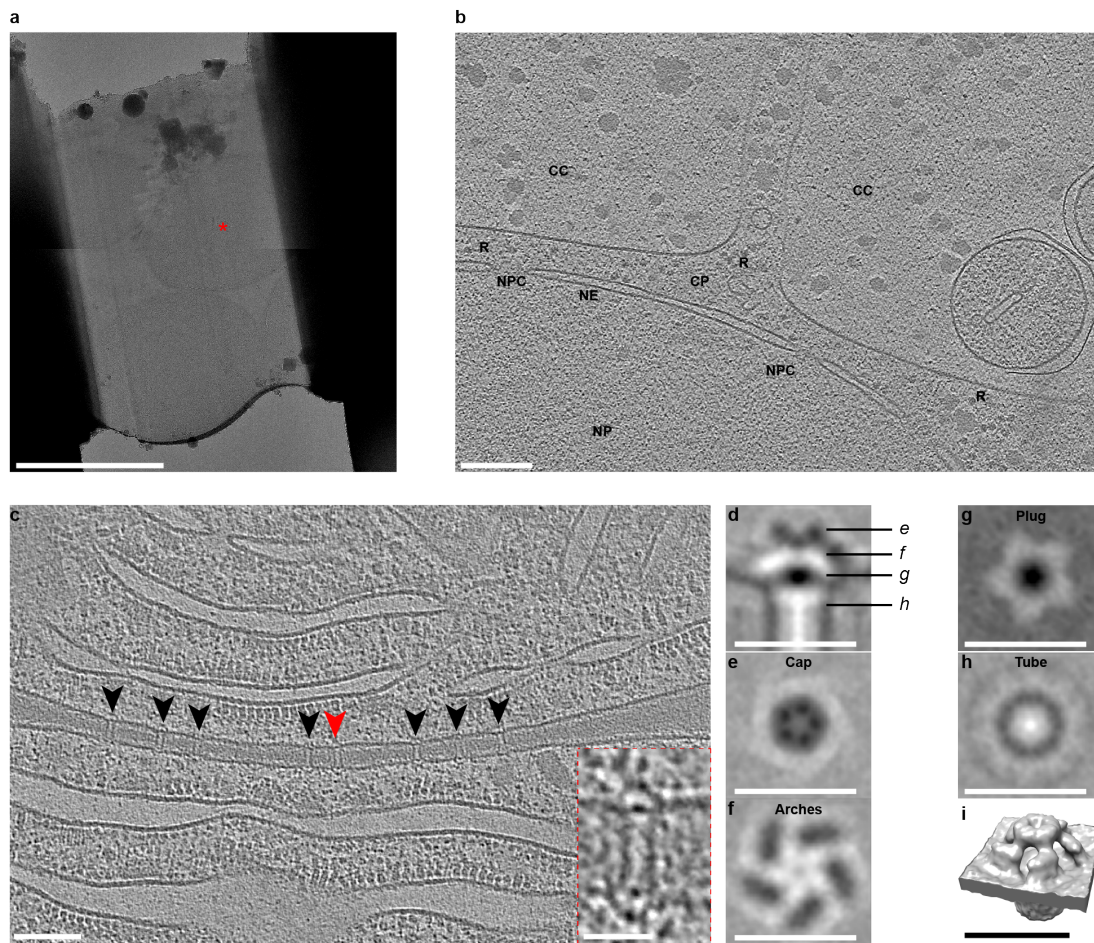

532

533 **Figure 3. Automated sequential cryoFIB milling results in high-quality lamellae**  
534 **and cryotomograms.**

535 **a:** CryoTEM overview image of a typical lamella (session C) containing multiple yeast  
536 cells. Red mark indicates the cell imaged in (b). Bar, 5  $\mu$ m.

537 **b:** Shown is an 18 nm thick slice through a cryotomogram of a yeast cell (session C)  
538 [indicated by red mark in (a)]. The thickness of the lamella was determined to be 225  
539 nm. The tomogram shows a characteristic nucleoplasm (NP), nuclear pore complexes  
540 (NPC), nuclear envelope (NE), cytoplasm (CP), cytoplasmic ribosomes (R), and other  
541 cellular compartments (CC). Bar, 200 nm.

542 **c:** Shown is a 14 nm thick slice through a cryotomogram of a septum between two  
543 *Anabaena* sp. PCC 7120 cyanobacteria cells (session F). The thickness of the lamella  
544 was determined to be 208 nm. Arrowheads indicate septal junctions. The inset shows a  
545 magnified view of the septal junction indicated by a red arrowhead. Other cellular  
546 features are cytoplasmic membranes (CM), phycobilisomes (PB), thylakoid membranes

547 (TM) and septal peptidoglycan (PG). Bars, 100 nm and 25 nm (inset).

548 **d-i:** A subtomogram average was generated by 5-fold symmetrizing 343 septal junctions  
549 that were extracted from nine tomograms. Shown are longitudinal (d) and perpendicular  
550 (e-h) slices (thickness 0.68 nm) and a surface rendering (i) of the symmetrized average.  
551 The observed characteristic structural modules were similar to a recent study that  
552 applied manual cryoFIB milling (Weiss et al., 2019) (also see Supplementary Fig. 3).  
553 Bars, 25 nm.

554

555 **Table 1. Overview and success rates of milling sessions.**

| Session | Sample Type                                    | Rough Milling   | Rough Milling Success | Polishing       | Polishing Success | Comments                                                                                                        |
|---------|------------------------------------------------|-----------------|-----------------------|-----------------|-------------------|-----------------------------------------------------------------------------------------------------------------|
| A       | Cyanobacterium<br><i>Anabaena</i> sp. PCC 7120 | Automated       | 10/10                 | Manual          | 10/10             |                                                                                                                 |
| B.1     | Yeast strain SK1                               | Automated       | 5/5                   | Manual          | 5/5               | Rough milling of both samples performed in the same session.                                                    |
| B.2     | Cyanobacterium<br><i>Anabaena</i> sp. PCC 7120 | Automated       | 5/5                   | Automated       | 5/5               |                                                                                                                 |
| C       | Yeast strain SK1                               | Automated       | 20/20                 | Automated       | 11/20             | Lamella were left in instrument for 10h before polishing, leading to lamellae bending and a lower success rate. |
| D       | Cyanobacterium<br><i>Anabaena</i> sp. PCC 7120 | Automated       | 7/7                   | Automated       | 7/7               |                                                                                                                 |
| E       | Cyanobacterium<br><i>Anabaena</i> sp. PCC 7120 | Automated       | 7/7                   | Automated       | 7/7               |                                                                                                                 |
| F       | Cyanobacterium<br><i>Anabaena</i> sp. PCC 7120 | Automated       | 18/19                 | Automated       | 16/18             | User selected one target two times for rough milling, leading to failure in rough milling.                      |
|         |                                                | Total Automated | 72/73 (99%)           | Total Automated | 46/57 (81%)       |                                                                                                                 |

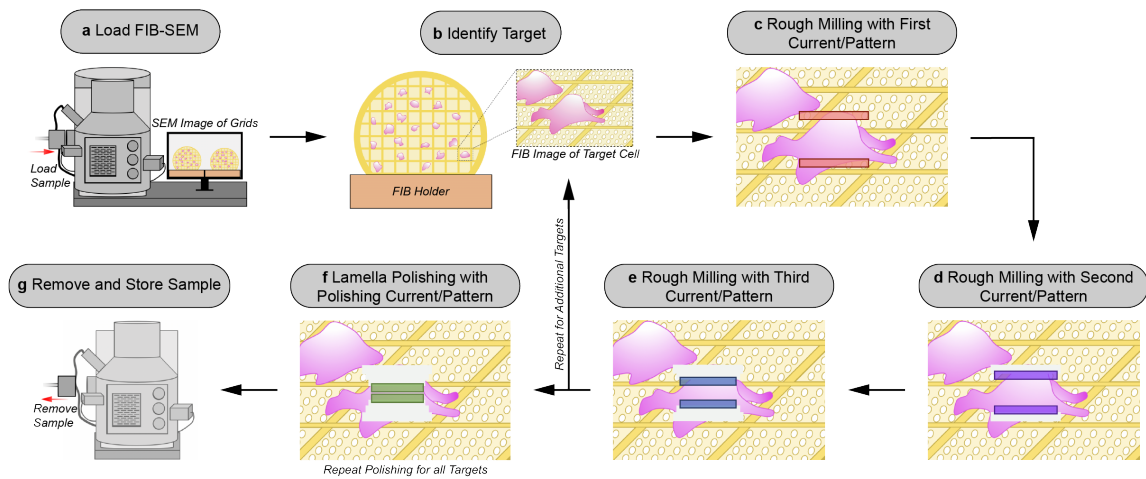

556

557 **Supplementary Figure 1. Schematic of the manual cryoFIB milling workflow.**

558 **a:** The sample is loaded into the FIB-SEM instrument.

559 **b:** A target is centered in the FIB image.

560 **c-e:** The first pair of rough milling patterns is placed on the target and milling is  
561 executed (c). Lamellae milling is observed via a live FIB view to determine when a  
562 milling step is completed. The same procedure is repeated for the second (d) and third  
563 (e) rough milling patterns. After rough milling of the target is completed, additional  
564 targets can be milled by repeating steps b-e.

565 **f:** Rough-milled lamellae are polished with a fourth set of milling patterns. Polishing is  
566 repeated for all rough-milled lamellae.

567 **g:** The grids with milled lamellae are removed and stored.

568

569

570

571

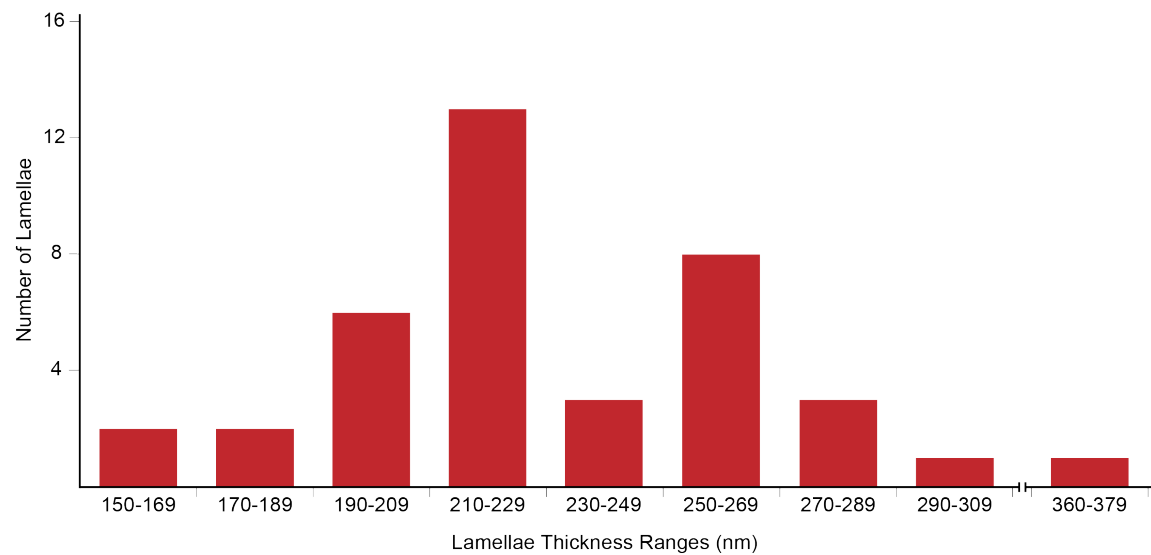

572

573 **Supplementary Figure 2. Distribution of lamellae thickness.**

574 The plot shows the distribution of the thickness values of fully automated sequential  
575 FIB-milled lamellae, as determined by cryoET imaging. The final polishing milling  
576 patterns were spaced 300 nm apart.

577

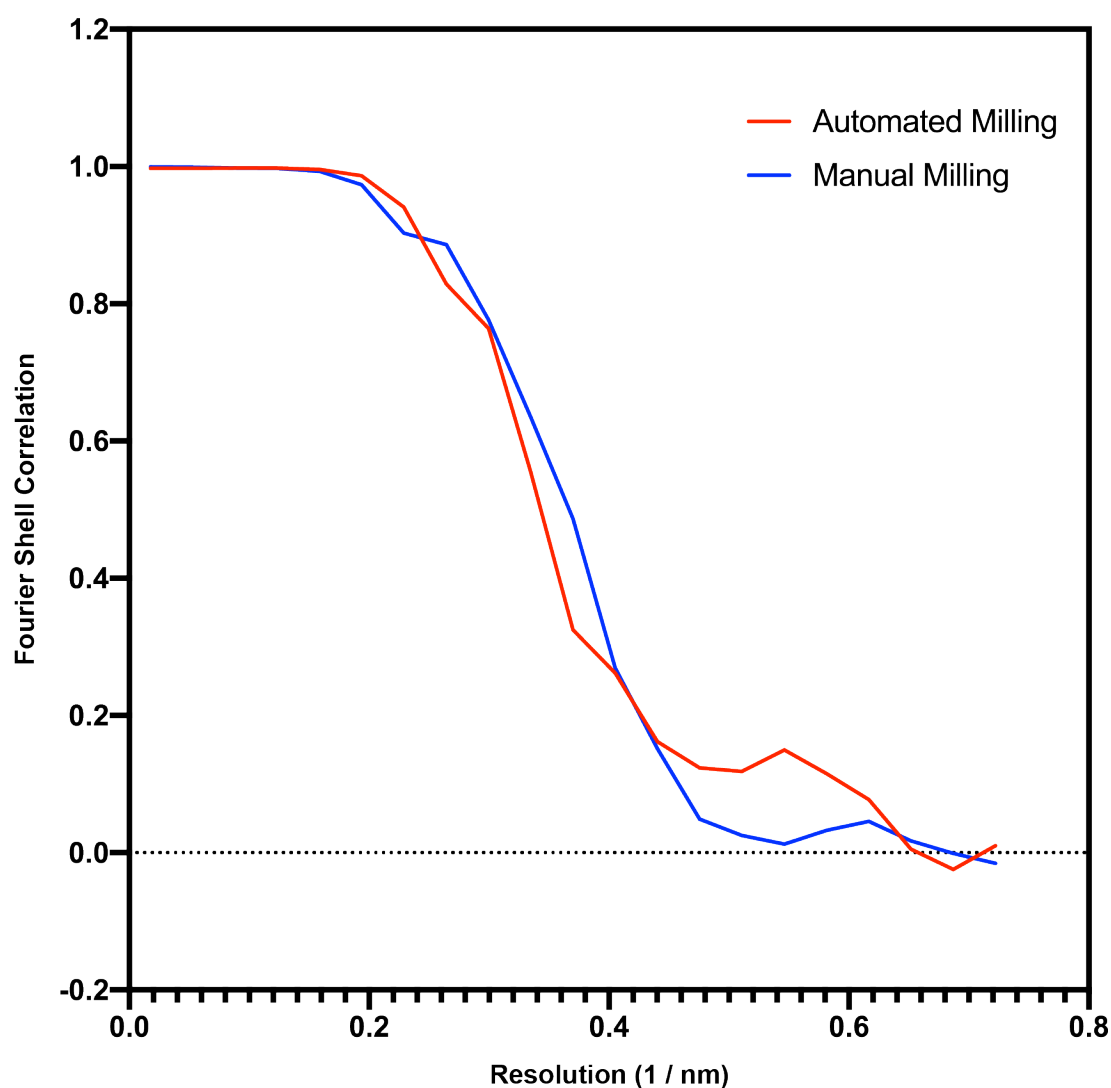

578

579 **Supplementary Figure 3. Comparison of data quality between manual and**  
580 **automated milling.**

581 Shown is a Fourier Shell Correlation (FSC) curve (blue) for the septal junction  
582 subtomogram average shown in Figure 3i (resulting from automated milling). The  
583 second curve (red) results from a dataset published previously (Weiss et al., 2019)  
584 (resulting from manual milling) and was calculated with the same number of randomly  
585 selected subvolumes after 5-fold symmetrization (n=1715). Both approaches result in a  
586 comparable resolution estimate.

587

588

589



590 **Supplementary Table 1. Dimensions and currents used for each milling pattern**  
591 **during automated sequential lamellae preparation.**

|                                                           |                                                                                        |
|-----------------------------------------------------------|----------------------------------------------------------------------------------------|
| Milling Patterns 1 and 2<br>(Rough Milling 1)             | 30 kV 700 pA<br>9 x 5 $\mu\text{m}$ rectangle<br>Patterns spaced 2 $\mu\text{m}$ apart |
| Milling Patterns 3 and 4<br>(Rough Milling 2)             | 30 kV 300 pA<br>8 x 2 $\mu\text{m}$ rectangle<br>Patterns spaced 1 $\mu\text{m}$ apart |
| Milling Patterns 5 and 6<br>(Rough Milling 3)             | 30 kV 100 pA<br>7.5 x 1 $\mu\text{m}$ rectangle<br>Patterns spaced 500 nm apart        |
| Milling Patterns 7 and 8<br>(Lamella Polishing)           | 30 kV 50 pA<br>7 x 0.5 $\mu\text{m}$ rectangle<br>Patterns spaced 300 nm apart         |
| Drift Correction Pattern<br>(Rough Milling and Polishing) | 3 x 3 $\mu\text{m}$ rectangle                                                          |

592

593
